# Supplementary material
Source: PubMed Central journal article supplement (PMC5766922)
Supplement: 10.1074_M117.808733_jbc.M117.808733-1.pdf [file 10.1074_M117.808733_jbc.M117.808733-1.pdf]

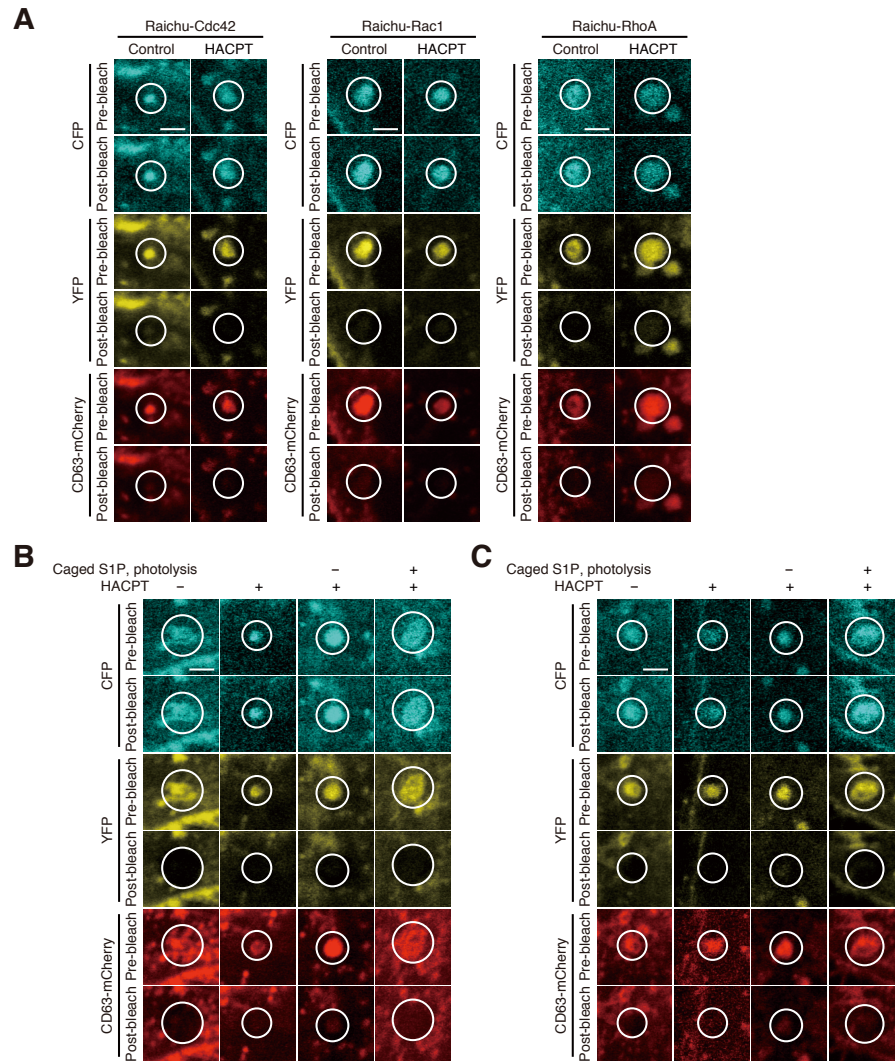

**Supplemental figure S1: Continuous activation of Rho family GTPases on MVEs downstream of S1P signaling.**

(A) The images of Raichu FRET probes (CFP (donor), YFP (acceptor)) on CD63-positive MVEs corresponding to Fig. 1B are shown. White circles represent the bleached areas of acceptor. Scale bar, 5  $\mu$ m.

(B) The Raichu-Cdc42 images (CFP (donor), YFP (acceptor)) on CD63-positive MVEs corresponding to Fig. 1C are shown. White circles represent the bleached areas of acceptor. Scale bar, 5  $\mu$ m.

(C) The Raichu-Rac1 images (CFP (donor), YFP (acceptor)) on CD63-positive MVEs corresponding to Fig. 1D are shown. White circles represent the bleached areas of acceptor. Scale bar, 5  $\mu$ m.
