# Supplementary material
Source: PubMed Central journal article supplement (PMC5766922)
Supplement: 10.1074_M117.808733_jbc.M117.808733-2.pdf [file 10.1074_M117.808733_jbc.M117.808733-2.pdf]

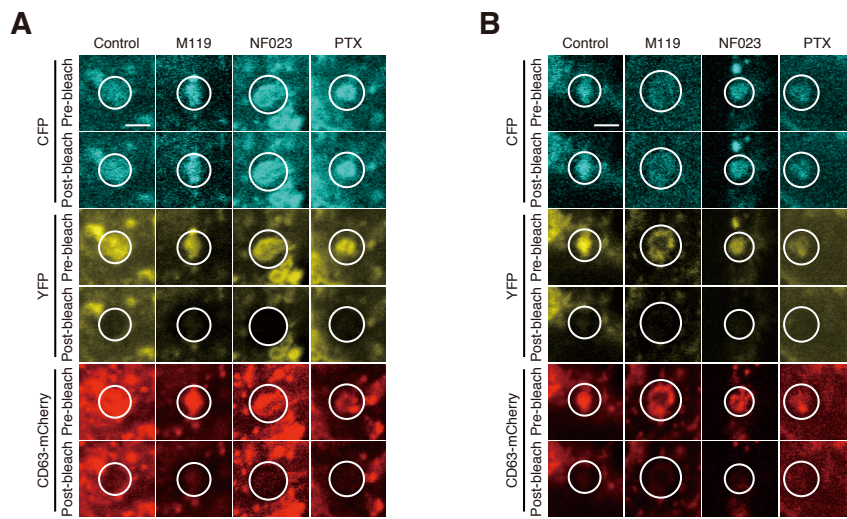

**Supplemental figure S2: Regulation of Rho family GTPases on MVEs by Gβγ subunits.**

(A) The Raichu-Cdc42 images (CFP (donor), YFP (acceptor)) on CD63-positive MVEs corresponding to Fig. 2A are shown. White circles represent the bleached areas of acceptor. Scale bar, 5 μm.

(B) The Raichu-Rac1 images (CFP (donor), YFP (acceptor)) on CD63-positive MVEs corresponding to Fig. 2B are shown. White circles represent the bleached areas of acceptor. Scale bar, 5 μm.
