# Supplementary material
Source: PubMed Central journal article supplement (PMC5766922)
Supplement: 10.1074_M117.808733_jbc.M117.808733-3.pdf [file 10.1074_M117.808733_jbc.M117.808733-3.pdf]

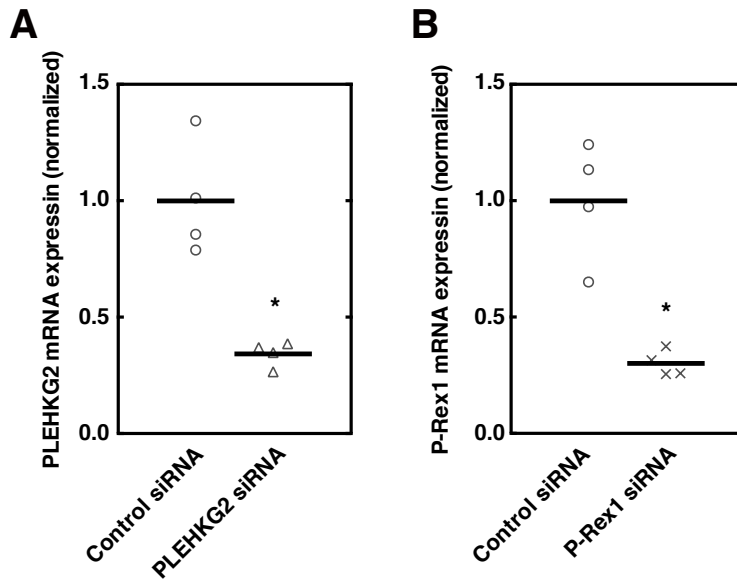

**Supplemental figure S3: Each Rho family GTPase GEF-siRNA treatment specifically reduces the respective mRNA expression.**

Knockdown effects of PLEKHG2 (A) and P-Rex1 siRNAs (B) were verified by real-time quantitative reverse transcription PCR in HeLa cells. Values of mRNA amounts were normalized to GAPDH expression. Results are expressed as median on scatter-dot plots ( $n \geq 4$ ; \* $P < 0.05$  versus (control siRNA); Welch' s t-test).
